# Supplementary material for: Fishing in the gene-pool: implementing trawl-associated eDNA metaprobe for large scale monitoring of fish assemblages
Source: Springer Nature journal article supplement (doi:10.1007/s11160-024-09874-y), 2024-07-17

**Supplementary material**

***Fishing in the gene-pool: implementing trawl-associated eDNA metaprobe for large scale monitoring of fish assemblages***

Giulia Maiello1,2,3, Andrea Bellodi4, Alessia Cariani5, Paolo Carpentieri6, Laura Carugati4, Davide Cicala1, Alice Ferrari5, Cristina Follesa4, Alessandro Ligas7, Paolo Sartor7, Alice Sbrana1,2, Peter Shum3, Matteo Stefani1,2, Lorenzo Talarico1, Stefano Mariani3,*, Tommaso Russo1,*

1 Department of Biology, University of Rome Tor Vergata, Via della Ricerca Scientifica 1, 00133 Rome, Italy

2 PhD Program in Evolutionary Biology and Ecology, University of Rome Tor Vergata, Via della Ricerca Scientifica 1, 00133, Rome, Italy

3 School of Biological and Environmental Sciences, Liverpool John Moores University, L3 3AF, Liverpool, UK

4 Department of Life and Environmental Science, University of Cagliari, Via T. Fiorelli 1, 09126, Cagliari, Italy

5 Department of Biological, Geological and Environmental Sciences, Alma Mater Studiorum University of Bologna, Via Sant’Alberto 163, 48123, Ravenna, Italy

6 General Fisheries Commission for the Mediterranean (GFCM) - Food and Agriculture Organization of the United Nations, 00193, Rome, Italy

7 Consorzio per il Centro Interuniversitario di Biologia Marina ed Ecologia Applicata “G. Bacci” (CIBM), Viale N. Sauro 4, 57128, Livorno, Italy

* These authors equally contributed to this work

Corresponding author: Giulia Maiello, School of Biological and Environmental Sciences, Liverpool John Moores University, Byrom Street, L3 3AF, Liverpool, UK. Email: [G.Maiello@ljmu.ac.uk](mailto:G.Maiello@ljmu.ac.uk)

**Table S1 –** GSA, date, geographical coordinates (datum = WGS84), mean values of bathymetry, and bathymetric range are given for each sampling site

| GSA | Site | Date | Lat (°N) | Long (°E) | Depth (m) | Depth range (m) | Distance (m) | Haul time (hrs) |
| --- | --- | --- | --- | --- | --- | --- | --- | --- |
| 9 | Tyrr_10 | 16/09/2021 | 40.96 | 13.43 | -539.5 | > 400 | 5472 | 1 |
| 9 | Tyrr_48 | 07/09/2021 | 42.58 | 11.07 | -42 | [0-100) | 2866 | 0.5 |
| 9 | Tyrr_59 | 07/09/2021 | 42.44 | 10.89 | -130 | [100-200) | 2285 | 0.5 |
| 9 | Tyrr_71 | 06/09/2021 | 42.50 | 9.96 | -606 | > 400 | 4840 | 1 |
| 9 | Tyrr_83 | 04/09/2021 | 42.49 | 10.44 | -254.5 | [200-400) | 4978 | 1 |
| 9 | Tyrr_87 | 05/09/2021 | 42.85 | 10.68 | -34.5 | [0-100) | 2764 | 0.5 |
| 11 | Sard_69 | 04/09/2021 | 39.54 | 8.40 | -43.5 | [0-100) | 2871 | 0.5 |
| 11 | Sard_70 | 04/09/2021 | 39.41 | 8.37 | -42.5 | [0-100) | 3148 | 0.5 |
| 11 | Sard_71 | 04/09/2021 | 39.33 | 8.29 | -146.5 | [100-200) | 2500 | 0.5 |
| 11 | Sard_72 | 04/09/2021 | 39.22 | 8.25 | -78 | [0-100) | 2766 | 0.5 |
| 11 | Sard_73 | 04/09/2021 | 39.12 | 8.21 | -81.5 | [0-100) | 2593 | 0.5 |
| 11 | Sard_74 | 05/09/2021 | 39.37 | 8.12 | -179.5 | [100-200) | 2500 | 0.5 |
| 11 | Sard_75 | 05/09/2021 | 39.32 | 8.04 | -286.5 | [200-400) | 5013 | 1 |
| 11 | Sard_77 | 05/09/2021 | 39.08 | 7.97 | -290.5 | [200-400) | 4834 | 1 |
| 11 | Sard_80 | 05/09/2021 | 38.85 | 8.35 | -544.5 | > 400 | 5216 | 1 |
| 11 | Sard_84 | 06/09/2021 | 38.66 | 8.41 | -564.5 | > 400 | 4630 | 1 |
| 17 | Adr_87 | 18/09/2021 | 44.33 | 13.29 | -52 | [0-100) | 3033 | 0.5 |
| 17 | Adr_89 | 18/09/2021 | 44.17 | 13.34 | -46 | [0-100) | 3040 | 0.5 |
| 17 | Adr_110 | 21/09/2021 | 45.40 | 13.05 | -26 | [0-100) | 2115 | 0.5 |
| 17 | Adr_115 | 22/09/2021 | 45.06 | 12.61 | -27.5 | [0-100) | 2481 | 0.5 |
| 17 | Adr_118 | 22/09/2021 | 44.91 | 12.91 | -32.5 | [0-100) | 2964 | 0.5 |

**Table S2** – Total number of reads at different step of the bioinformatic process are given for each library (Tele02 and Elas02) separately.

| Tele02 Library |  |
| --- | --- |
| Total reads | 3,700,000 |
| Total reads after bioinformatic analysis | 2,243,929 |
| Total reads assigned taxonomy (Eukaryota) | 2,239,024 |
| Total reads assigned to non-fish taxa | 70,039 |
| Total reads assigned to fish taxa (Actinopterygii, Chondrichthyes) | 2,168,985 |
| Total reads assigned to fish taxa after filtering | 1,878,487 |

| Elas02 Library |  |
| --- | --- |
| Total reads | 4,100,000 |
| Total reads after bioinformatic analysis | 2,257,888 |
| Total reads assigned taxonomy (Eukaryota) | 2,253,581 |
| Total reads assigned to non-fish taxa | 76,857 |
| Total reads assigned to fish taxa (Actinopterygii, Chondrichthyes) | 2,176,724 |
| Total reads assigned to fish taxa after filtering | 1,471,036 |

**Table S3** – GSA, name of the site, and proportions of reads associated to all the very abundant caught species before the first ‘bonus’ species (calculated as the total number of reads associated to the very abundant caught species over the total number of reads) are given for each of the 21 sampling sites

| GSA | Sampling Site | Proportion reads of abundant caught species |
| --- | --- | --- |
| 9 | Tyrr_10 | 0.50 |
| 9 | Tyrr_48 | 0.80 |
| 9 | Tyrr_59 | 0.89 |
| 9 | Tyrr_71 | 0.71 |
| 9 | Tyrr_83 | 0.86 |
| 9 | Tyrr_87 | 0.87 |
| 11 | Sard_69 | 0.37 |
| 11 | Sard_70 | 0.64 |
| 11 | Sard_71 | 0.87 |
| 11 | Sard_72 | 0.69 |
| 11 | Sard_73 | 0.57 |
| 11 | Sard_74 | 0.87 |
| 11 | Sard_75 | 0.83 |
| 11 | Sard_77 | 0.75 |
| 11 | Sard_80 | 0.60 |
| 11 | Sard_84 | 0.76 |
| 17 | Adr_110 | 0.54 |
| 17 | Adr_115 | 0.92 |
| 17 | Adr_118 | 0.92 |
| 17 | Adr_87 | 0.83 |
| 17 | Adr_89 | 0.65 |

**Table S4 -** Statistical significance of differences in community structure from eDNA (square-root transformed) reads among pairs of sampling areas (A) and depth ranges (B), as returned by pairwise PERMANOVA. Values are related to Bray-Curtis coefficients

| A |  |  |  |  |
| --- | --- | --- | --- | --- |
|  | **Areas** | **F.Model** | **R2** | **p-value** |
|  | Adr vs Sard | 10.82 | 0.28 | < 0.05 |
|  | Adr vs Tyrr | 5.80 | 0.22 | < 0.05 |
|  | Sard vs Tyrr | 3.91 | 0.22 | < 0.05 |
|  |  |  |  |  |
| B |  |  |  |  |
|  | **Depth ranges** | **F.Model** | **R2** | **p-value** |
|  | [0-100m) vs [100-200m) | 5.56 | 0.18 | < 0.05 |
|  | [0-100m) vs [200-400m) | 6.71 | 0.20 | < 0.05 |
|  | [0-100m) vs >400m | 12.91 | 0.31 | < 0.05 |
|  | [100-200m) vs [200-400m) | 2.64 | 0.21 | < 0.05 |
|  | [100-200m) vs >400m | 10.28 | 0.46 | < 0.05 |
|  | [200-400m) vs >400m | 6.95 | 0.37 | < 0.05 |
|  |  |  |  |  |

**Table S5 -** Species identified by the indicator species analyses as significantly characteristic (significance at α= 0.05) for each sampling region (Area) and for each bathymetric layer (Depth range) respectively, sorted by relative influence from top to down

| Area | | | Depth range (m) | | | |
| --- | --- | --- | --- | --- | --- | --- |
| Adriatic  Sea | **Sardinian Sea** | **Tyrrhenian Sea** | **[0-100)** | **[100-200)** | **[200-400)** | **> 400** |
| *Sprattus sprattus* | *Lepidotrigla*  spp. | *Stomias boa* | *Arnoglossus laterna* | *Macroramphosus scolopax* | *Maurolicus muelleri* | *Hymenocephalus italicus* |
| *Arnoglossus laterna* | *Spicara*  spp. | *Boops boops* | *Sardina pilchardus* | *Trisopterus capelanus* | *Chelidonichthys*  spp. | *Diaphus rafinesquii* |
| *Squalus acanthias* | *Glossanodon*  spp. | *Chimaera monstrosa* | *Serranus cabrilla* |  | *Scyliorhinus canicula* | *Nettastoma melanurum* |
| *Scomber scombrus* | *Mullus surmuletus* |  | *Serranus*  spp. |  | *Peristedion* | *Lampanyctus crocodilus* |
| *Engraulis encrasicolus* |  |  |  |  |  | *Phycis blennoides* |
| *Merlangius merlangus* |  |  |  |  |  | *Hoplostethus mediterraneus* |
| *Scomber colias* |  |  |  |  |  | *Epigonus denticulatus* |
| *Myliobatis aquila* |  |  |  |  |  | *Etmopterus spinax* |
| *Trachinus draco* |  |  |  |  |  | *Galeus melastomus* |
| *Pomatoschistus minutus* |  |  |  |  |  | *Arctozenus risso* |
| *Sardina pilchardus* |  |  |  |  |  | *Hygophum hygomii* |
| *Serranus*  spp. |  |  |  |  |  | *Nezumia*  spp. |
| *Scorpaena*  spp. |  |  |  |  |  |  |
| *Cepola macrophthalma* |  |  |  |  |  |  |
| *Scorpaena scrofa* |  |  |  |  |  |  |

**Table S6 -** List of the taxa detected by visual sorting (Catch) and metabarcoding for Tele02 and Elas02 separately

| Scientific name | Class | Tele02 12S | Elas02 12S | Catch |
| --- | --- | --- | --- | --- |
| *Alepocephalus* spp*.* | Actinopterygii | X | X |  |
| *Alosa fallax* | Actinopterygii | X | X | X |
| *Aphia minuta* | Actinopterygii | X | X |  |
| *Arctozenus risso* | Actinopterygii | X | X |  |
| *Argentina sphyraena* | Actinopterygii | X | X | X |
| *Argyropelecus hemigymnus* | Actinopterygii |  |  | X |
| *Arnoglossus laterna* | Actinopterygii | X | X | X |
| *Arnoglossus rueppelii* | Actinopterygii |  |  | X |
| *Arnoglossus thori* | Actinopterygii |  |  | X |
| *Blennius ocellaris* | Actinopterygii |  |  | X |
| *Boops boops* | Actinopterygii | X | X | X |
| *Callionymus maculatus* | Actinopterygii |  |  | X |
| *Capros aper* | Actinopterygii | X | X | X |
| *Cepola macrophthalma* | Actinopterygii | X | X | X |
| *Ceratoscopelus maderensis* | Actinopterygii | X | X |  |
| *Chauliodus sloani* | Actinopterygii |  |  | X |
| *Chelidonichthys cuculus* | Actinopterygii |  |  | X |
| *Chelidonichthys lastoviza* | Actinopterygii |  |  | X |
| *Chelidonichthys lucerna* | Actinopterygii |  |  | X |
| *Chelidonichthys* spp. | Actinopterygii | X | X |  |
| *Chimaera monstrosa* | Chondrichthyes | X | X | X |
| *Chlorophthalmus agassizi* | Actinopterygii | X | X | X |
| *Citharus linguatula* | Actinopterygii | X | X | X |
| *Coelorinchus caelorhincus* | Actinopterygii | X | X | X |
| *Conger conger* | Actinopterygii | X |  | X |
| *Crystallogobius linearis* | Actinopterygii | X | X |  |
| *Cyclothone microdon* | Actinopterygii | X | X |  |
| *Dactylopterus volitans* | Actinopterygii | X |  | X |
| *Dasyatis pastinaca* | Chondrichthyes | X | X |  |
| *Deltentosteus quadrimaculatus* | Actinopterygii |  |  | X |
| *Dentex* spp. | Actinopterygii | X | X |  |
| *Diaphus* spp*.* | Actinopterygii | X |  |  |
| *Diaphus metopoclampus* | Actinopterygii | X |  | X |
| *Diaphus rafinesquii* | Actinopterygii | X | X |  |
| *Diplodus annularis* | Actinopterygii |  |  | X |
| *Dipturus oxyrinchus* | Chondrichthyes | X | X | X |
| *Echiodon* spp*.* | Actinopterygii | X | X |  |
| *Engraulis encrasicolus* | Actinopterygii | X | X | X |
| *Epigonus denticulatus* | Actinopterygii | X | X | X |
| *Epigonus telescopus* | Actinopterygii |  |  | X |
| *Etmopterus spinax* | Chondrichthyes | X | X | X |
| *Eutrigla gurnardus* | Actinopterygii |  |  | X |
| *Facciolella oxyrhyncha* | Actinopterygii | X | X |  |
| *Gadiculus argenteus* | Actinopterygii | X | X | X |
| *Gaidropsarus mediterraneus* | Actinopterygii |  |  | X |
| *Galeus melastomus* | Chondrichthyes | X | X | X |
| *Glossanodon leioglossus* | Actinopterygii |  |  | X |
| *Glossanodon* spp. | Actinopterygii | X | X |  |
| *Gnathophis* spp. | Actinopterygii | X | X |  |
| *Gobius niger* | Actinopterygii | X |  | X |
| *Gymnammodytes* spp. | Actinopterygii | X | X |  |
| *Helicolenus dactylopterus* | Actinopterygii | X | X | X |
| *Hoplostethus mediterraneus* | Actinopterygii | X | X | X |
| *Hygophum benoiti* | Actinopterygii | X |  |  |
| *Hygophum hygomii* | Actinopterygii | X | X |  |
| *Hymenocephalus italicus* | Actinopterygii | X | X | X |
| *Isurus oxyrinchus* | Chondrichthyes |  | X |  |
| *Lampanyctus crocodilus* | Actinopterygii | X | X | X |
| *Lepidion lepidion* | Actinopterygii | X | X |  |
| *Lepidopus caudatus* | Actinopterygii | X | X | X |
| *Lepidorhombus boscii* | Actinopterygii |  |  | X |
| *Lepidorhombus whiffiagonis* | Actinopterygii | X | X | X |
| *Lepidotrigla cavillone* | Actinopterygii |  |  | X |
| *Lepidotrigla dieuzeidei* | Actinopterygii |  |  | X |
| *Lepidotrigla* spp. | Actinopterygii | X | X |  |
| *Lesueurigobius friesii* | Actinopterygii | X | X | X |
| *Lesueurigobius suerii* | Actinopterygii |  | X |  |
| *Leucoraja circularis* | Chondrichthyes |  | X |  |
| *Lophius budegassa* | Actinopterygii | X |  | X |
| *Lophius piscatorius* | Actinopterygii |  | X |  |
| *Macroramphosus scolopax* | Actinopterygii | X | X | X |
| *Maurolicus muelleri* | Actinopterygii | X | X | X |
| *Merlangius merlangus* | Actinopterygii | X | X | X |
| *Merluccius merluccius* | Actinopterygii | X | X | X |
| *Microchirus variegatus* | Actinopterygii |  |  | X |
| *Micromesistius poutassou* | Actinopterygii | X | X | X |
| *Molva dypterygia* | Actinopterygii | X |  | X |
| *Mullus barbatus* | Actinopterygii | X | X | X |
| *Mullus surmuletus* | Actinopterygii | X | X | X |
| *Mustelus mustelus* | Chondrichthyes |  | X | X |
| *Mustelus punctulatus* | Chondrichthyes |  | X | X |
| *Myliobatis aquila* | Chondrichthyes |  | X | X |
| *Nemichthys scolopaceus* | Actinopterygii | X | X |  |
| *Nettastoma melanurum* | Actinopterygii | X | X | X |
| *Nezumia sclerorhynchus* | Actinopterygii |  |  | X |
| *Nezumia* spp. | Actinopterygii | X | X |  |
| *Notacanthus bonaparte* | Actinopterygii | X | X | X |
| *Notoscopelus elongatus* | Actinopterygii | X | X |  |
| *Pagellus acarne* | Actinopterygii | X | X | X |
| *Pagellus bogaraveo* | Actinopterygii | X | X | X |
| *Pagellus erythrinus* | Actinopterygii | X | X | X |
| *Pagrus pagrus* | Actinopterygii | X |  | X |
| *Peristedion cataphractum* | Actinopterygii |  |  | X |
| *Peristedion spp.* | Actinopterygii | X | X |  |
| *Phycis blennoides* | Actinopterygii | X | X | X |
| *Pomatoschistus minutus* | Actinopterygii | X | X |  |
| *Prionace glauca* | Chondrichthyes |  | X |  |
| *Pseudaphya ferreri* | Actinopterygii | X | X |  |
| *Pteroplatytrygon violacea* | Chondrichthyes |  | X |  |
| *Raja asterias* | Chondrichthyes |  |  | X |
| *Raja clavata* | Chondrichthyes |  |  | X |
| *Raja brachyura* | Chondrichthyes | X |  | X |
| *Raja miraletus* | Chondrichthyes | X | X | X |
| *Raja polystigma* | Chondrichthyes |  | X | X |
| *Raja* spp*.* | Chondrichthyes | X | X |  |
| *Sarda sarda* | Actinopterygii | X | X | X |
| *Sardina pilchardus* | Actinopterygii | X | X | X |
| *Sardinella aurita* | Actinopterygii | X | X | X |
| *Scomber colias* | Actinopterygii | X | X | X |
| *Scomber scombrus* | Actinopterygii | X | X | X |
| *Scorpaena notata* | Actinopterygii |  |  | X |
| *Scorpaena porcus* | Actinopterygii |  |  | X |
| *Scorpaena scrofa* | Actinopterygii | X | X | X |
| *Scorpaena* spp. | Actinopterygii |  | X |  |
| *Scyliorhinus canicula* | Chondrichthyes | X | X | X |
| *Serranus hepatus* | Actinopterygii |  |  | X |
| *Serranus spp.* | Actinopterygii | X |  |  |
| *Serranus cabrilla* | Actinopterygii | X | X | X |
| *Solea solea* | Actinopterygii | X | X | X |
| *Sparus aurata* | Actinopterygii |  | X |  |
| *Spicara flexuosa* | Actinopterygii |  |  | X |
| *Spicara smaris* | Actinopterygii |  |  | X |
| *Spicara* spp. | Actinopterygii | X | X |  |
| *Sprattus sprattus* | Actinopterygii | X | X | X |
| *Squalus acanthias* | Chondrichthyes |  | X | X |
| *Squalus blainville* | Chondrichthyes |  | X |  |
| *Stomias boa* | Actinopterygii | X | X | X |
| *Symphodus cinereus* | Actinopterygii | X |  |  |
| *Symphurus nigrescens* | Actinopterygii |  |  | X |
| *Synchiropus phaeton* | Actinopterygii |  |  | X |
| *Synodus saurus* | Actinopterygii |  |  | X |
| *Torpedo* spp. | Chondrichthyes |  | X |  |
| *Trachinus draco* | Actinopterygii | X | X | X |
| *Trachurus mediterraneus* | Actinopterygii | X |  | X |
| *Trachurus trachurus* | Actinopterygii | X | X | X |
| *Trachyrincus spp.* | Actinopterygii | X | X |  |
| *Trigla lyra* | Actinopterygii |  |  | X |
| *Trisopterus capelanus* | Actinopterygii | X | X | X |
| *Uranoscopus scaber* | Actinopterygii | X | X | X |
| *Zeus faber* | Actinopterygii | X | X | X |

**Fig. S1 –** Barplot representing the distribution of bathymetry among the 24 sampling sites. The ‘count’ corresponds to the number of sites for each depth value


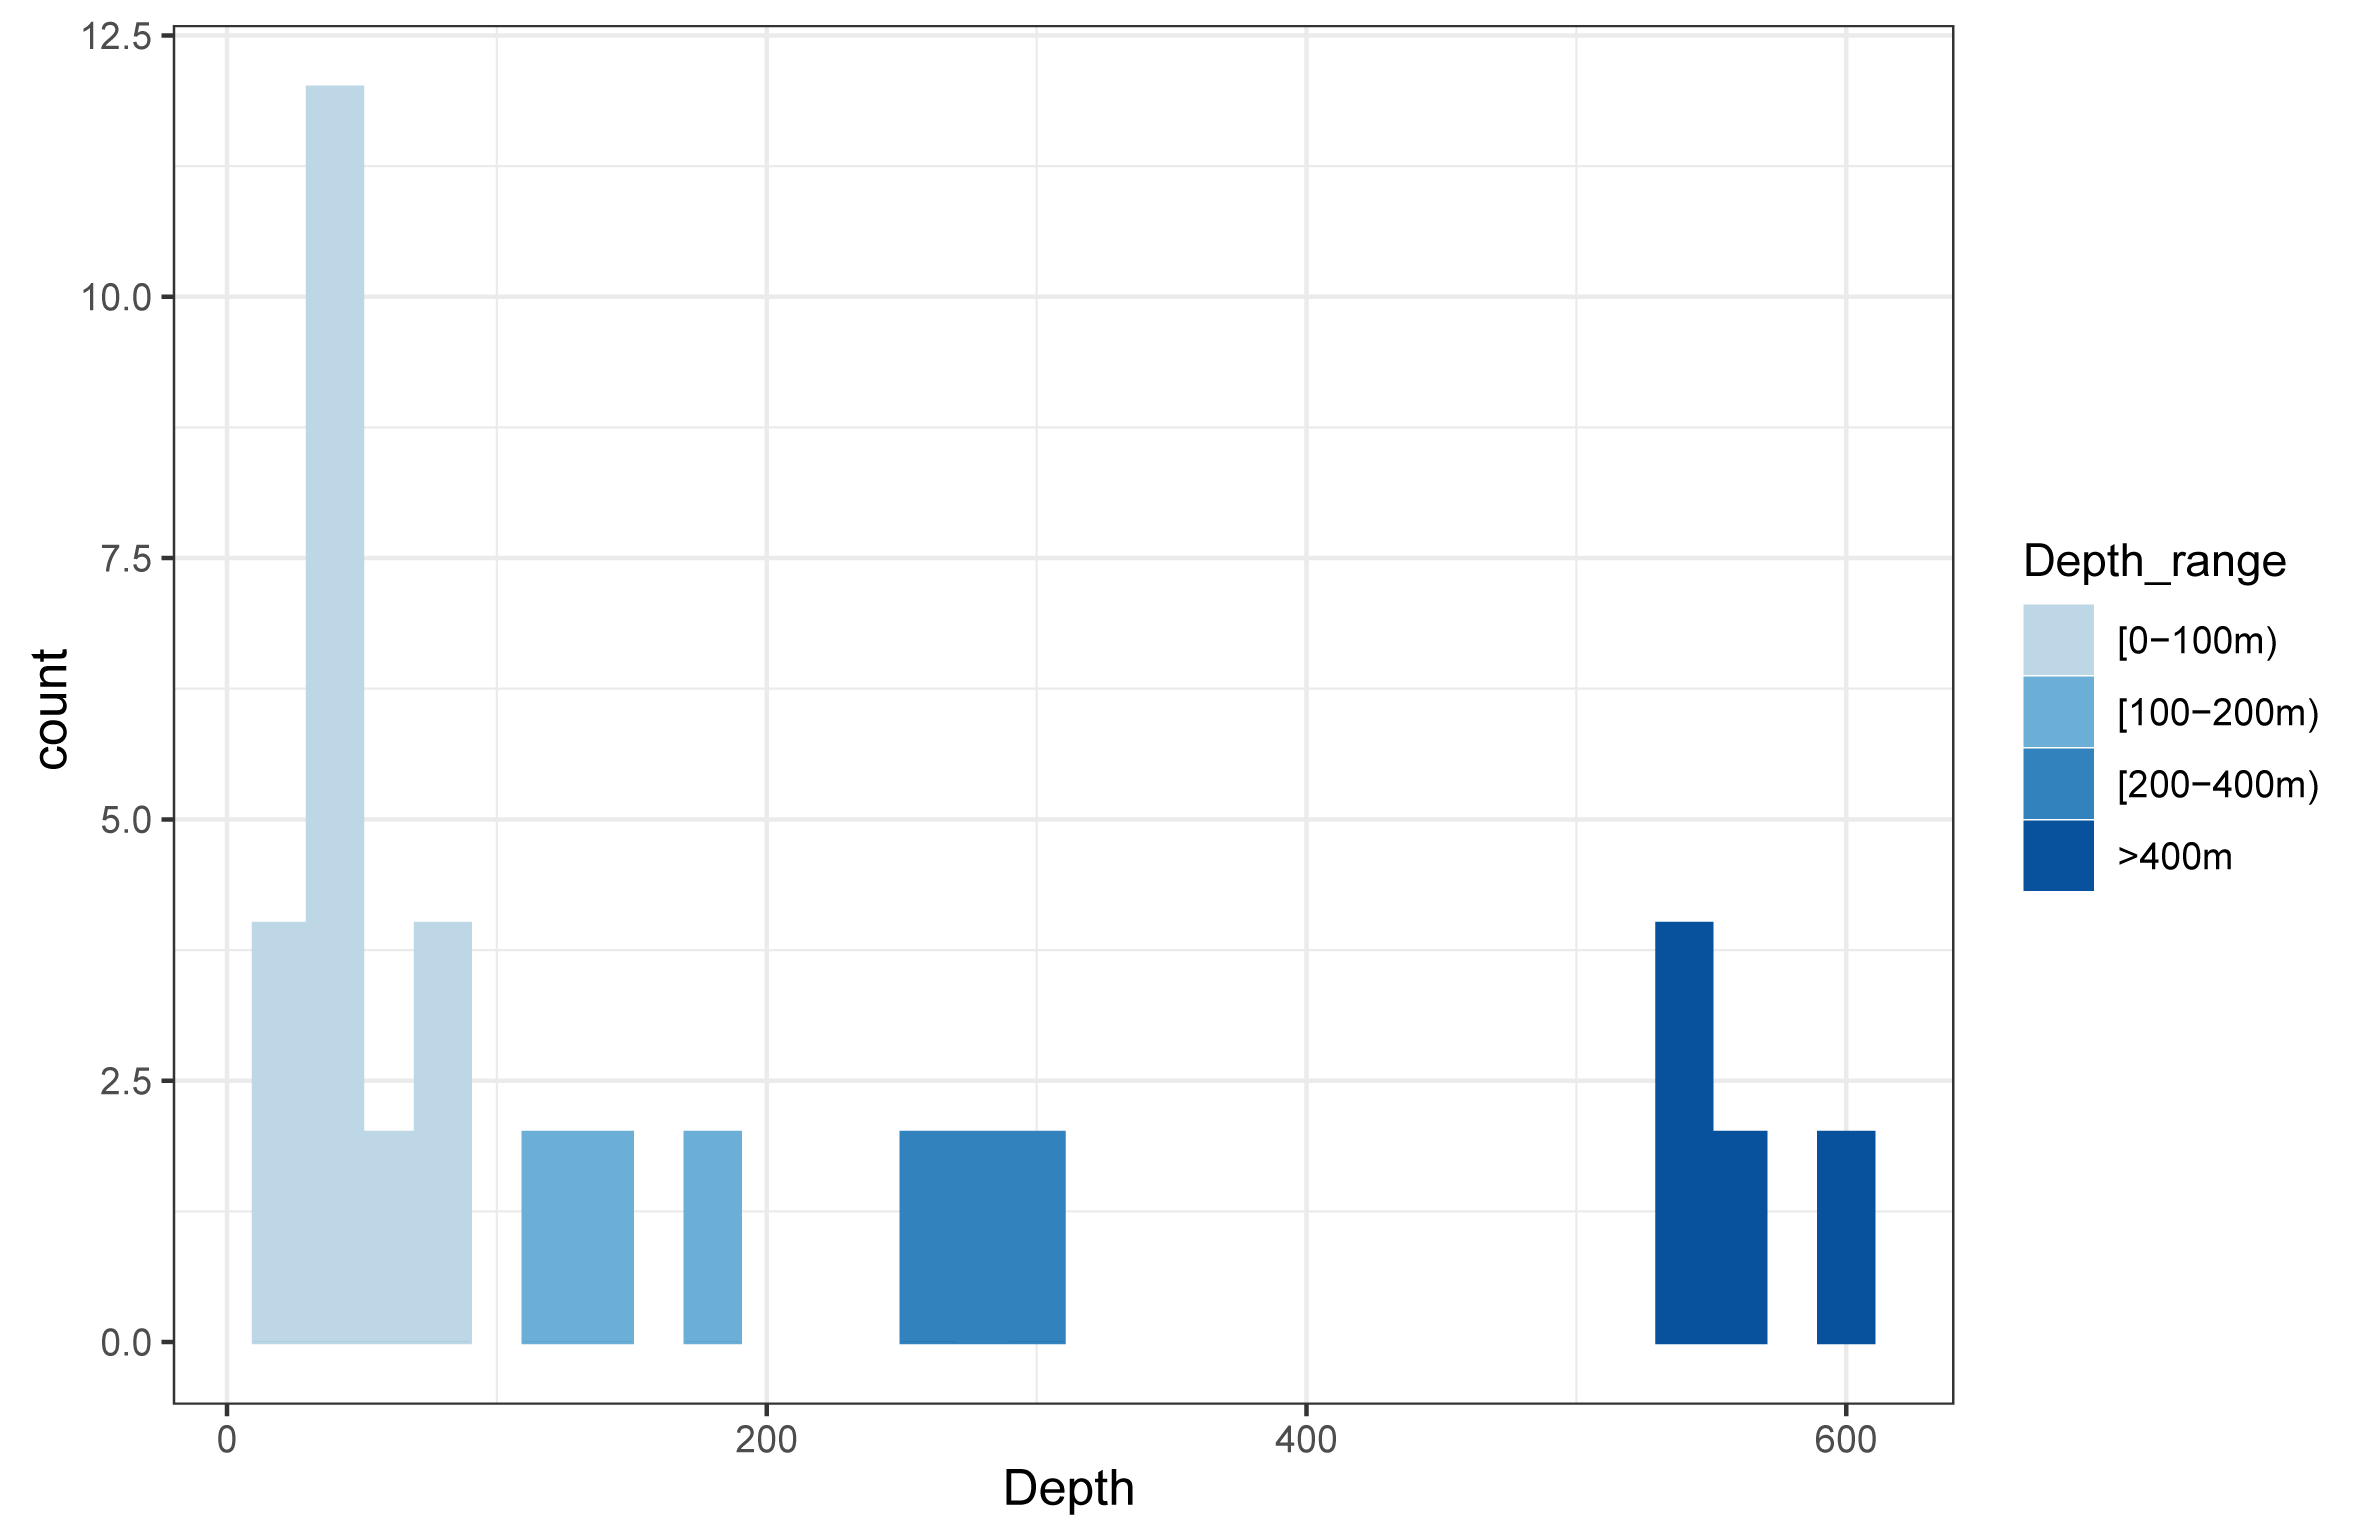

Supplement: MOESM1 [file 11160_2024_9874_MOESM1_ESM.docx]
